# Supplementary material for: In silico Druggability Assessment of the NUDIX Hydrolase Protein Family as a Workflow for Target Prioritization
Source: Front Chem. 2020 May 29;8:443. doi: 10.3389/fchem.2020.00443 (PMC7274155; doi:10.3389/fchem.2020.00443)
Supplement: Supplementary file 1 [file Table_1.xlsx]

## Sheet: SiteMap
ID	Uniprot ID	Gene Name	Protein Name	Length	Substrate	Structure	X-ray	Resolution	Alignment score	RMSD	Dscore	Source	ZFN Mean	ZFN Median	phobic	philic	balance
1	P36639	NUDT1	7,8-Dihydro-8-oxoguanine triphosphatase	156	8-oxo-dGTP, 5-OH-dATP	P36639	3Q93	1.8	ND	ND	1.02	SGC	-11.617	-11.441	0.778	1.127	0.691
2	P50583	NUDT2, APAH1	Bis(5'-nucleosyl)-tetraphosphatase [asymmetrical]	147	Ap4A	P50583	3U53	2.71	0.258	2.54	0.91	23384440	-6.669	-6.45	0.282	1.241	0.227
3	O95989	NUDT3, DIPP, DIPP1	Diphosphoinositol polyphosphate phosphohydrolase 1	172	PP-InsP5, [PP]2-InsP4	O95989	2FVV	1.25	0.203	2.238	0.735	19585659	-7.495	-6.696	0.019	1.4999	0.013
4	Q9NZJ9	NUDT4, DIPP2, KIAA0487, HDCMB47P	Diphosphoinositol polyphosphate phosphohydrolase 2	180	PP-InsP5, [PP]2-InsP4	Q9NZJ9	5LTU	2.23	0.202	2.211	0.51	SGC	-4.402	-3.98	0.014	1.499	0.00095
5	Q9UKK9	NUDT5, HSPC115	ADP-sugar pyrophosphatase	219	ADP-ribose, ADP-mannose, ADP-glucose, 8-oxo-GDP, 8-oxo-dGDP	Q9UKK9	6GRU	1.93	0.416	3.226	1.11	SGC	-10	-9.86	1.334	0.993	1.344
6	P53370	NUDT6, FGF2AS	Nucleoside diphosphate-linked moiety X motif 6	316	Unknown	P53370	3H95	1.7	0.282	2.628	0.769	SGC	-7.843	-7.665	0.322	1.182	0.273
7	P0C024	NUDT7	Peroxisomal coenzyme A diphosphatase NUDT7	238	CoA, CoA esters, oxidized CoA	P0C024	5T3P	2.03	0.309	2.78	1.04	SGC	-7.481	-7.371	0.819	1.132	0.724
8	Q8WV74	NUDT8	Nucleoside diphosphate-linked moiety X motif 8	236	Unknown	Q8WV74	NA	NA	NA	NA	NA	NA
9	Q9BW91	NUDT9, NUDT10, PSEC0099, UNQ3012/PRO9771	ADP-ribose pyrophosphatase, mitochondrial	350	ADP-ribose	Q9BW91	1Q33	1.81	0.288	2.684	1.013	12948489	-7.502	-7.372	0.4089	1.109	0.369
10	Q8NFP7	NUDT10, APS2, DIPP3A	Diphosphoinositol polyphosphate phosphohydrolase 3-alpha	164	PP-InsP5, Ap6A, Ap5A, 5-phosphoribose 1-diphosphate	Q8NFP7	3MCF	2	0.299	2.718	0.585	SGC	-4.474	-4.289	0.019995	1.638	0.0122
11	Q96G61	NUDT11, APS1, DIPP3B	Diphosphoinositol polyphosphate phosphohydrolase 3-beta	164	PP-InsP5, Ap6A, Ap5A, 5-phosphoribose 1-diphosphate	Q96G61	NA	NA	NA	NA	NA	NA
12	Q9BQG2	NUDT12	Peroxisomal NADH pyrophosphatase NUDT12	462	NAD(P)H, diadenosine diphosphate	Q9BQG2	6SGX	2.92	0.287	2.671	1.061	31875550	-7.81	-7.745	0.675147	0.964859	0.699736
13	Q86X67	NUDT13	Nucleoside diphosphate-linked moiety X motif 13	352	Unknown	Q86X67	NA	NA	NA	NA	NA	NA
14	O95848	NUDT14, UGPP	Uridine diphosphate glucose pyrophosphatase	222	UDP-glucose, ADP-ribose	O95848	3Q91	2.7	0.354	2.932	0.89	SGC	-5.971	-5.842	0.4301	1.0816	0.3977
15	Q9NV35	NUDT15, MTH2	Probable 8-oxo-dGTP diphosphatase NUDT15	164	GTP, dGTP, 6-thio-GTP, 6thio-dGTP	Q9NV35	5BON	1.8	0.231	2.405	0.997	26238318	-7.608	-7.493	0.835	1.35	0.619
16	Q96DE0	NUDT16	U8 snoRNA-decapping enzyme	195	IDP > dIDP >> GDP = dGDP > XDP = ITP = dITP	Q96DE0	3COU	1.8	0.222	2.357	0.931	SGC	-6.761	-6.647	0.278	1.286	0.216
17	P0C025	NUDT17	Nucleoside diphosphate-linked moiety X motif 17	328	Unknown	P0C025	5LF8	2.56	0.263	2.565	1.01	SGC	-8.855	-8.781	0.611	1.218	0.501
18	Q6ZVK8	NUDT18, MTH3	8-oxo-dGDP phosphatase NUDT18	323	8-oxo-dGDP, 8-oxo-GDP	Q6ZVK8	3GG6	2.1	0.251	2.5	0.605	SGC	-5.818	-5.011	0.3901	1.2022	0.325
19	A8MXV4	NUDT19	Nucleoside diphosphate-linked moiety X motif 19	375	CoA esters	A8MXV4	NA	NA	NA	NA	NA	NA
20	Q8IU60	NUDT20, DCP2	m7GpppN-mRNA hydrolase	420	mRNA 7-methyl guanine cap	Q8IU60	5MP0	1.63	0.312	2.794	0.73	SGC	-4.809	-4.699	0.31	0.827	0.375
21	O43809	NUDT21 CFIM25,CPSF25,CPSF5	Cleavage and polyadenylation specificity factor subunit 5	227	pre-mRNA	O43809	3BAP	1.85	0.308	2.752	0.99	18445629	-5.91	-5.784	0.242	1.161	0.208
22	Q9BRQ3	NUDT22 PP11246	Nucleoside diphosphate-linked moiety X motif 22	303	Unknown	Q9BRQ3	5LF9	1.45	0.367	2.938	1.044	SGC	-6.39	-6.255	0.6399	1.105	0.579
23	P18031	PTP1B	Tyrosine-protein phosphatase non-receptor type 1	435		P18031	2HNP	2.85	ND	ND	0.78	8128219	-6.926	-6.818	0.0579	1.287	0.045

## Sheet: SiteMap secondary sites
ID	Uniprot ID	Gene Name	Protein Name	Length	Substrate	Structure	X-ray	Resolution	Alignment score	RMSD	Dscore #2	Dscore #3	hydphil/hydrophob balnce	volume	hydphil/hydrophob balnce	volume		crystallized aa# (total aa)
1	P36639	NUDT1	7,8-Dihydro-8-oxoguanine triphosphatase	156	8-oxo-dGTP, 5-OH-dATP	P36639	3Q93	1.8	ND	ND								full length
2	P50583	NUDT2, APAH1	Bis(5'-nucleosyl)-tetraphosphatase [asymmetrical]	147	Ap4A	P50583	3U53	2.71	0.258	2.54								full length
3	O95989	NUDT3, DIPP, DIPP1	Diphosphoinositol polyphosphate phosphohydrolase 1	172	PP-InsP5, [PP]2-InsP4	O95989	2FVV	1.25	0.203	2.238								missing after 142 (172)
4	Q9NZJ9	NUDT4, DIPP2, KIAA0487, HDCMB47P	Diphosphoinositol polyphosphate phosphohydrolase 2	180	PP-InsP5, [PP]2-InsP4	Q9NZJ9	5LTU	2.23	0.202	2.211								missing after 146 (180)
5	Q9UKK9	NUDT5, HSPC115	ADP-sugar pyrophosphatase	219	ADP-ribose, ADP-mannose, ADP-glucose, 8-oxo-GDP, 8-oxo-dGDP	Q9UKK9	6GRU	1.93	0.416	3.226	1.02		0.65	501.8				missing after 207 (219)
6	P53370	NUDT6, FGF2AS	Nucleoside diphosphate-linked moiety X motif 6	316	Unknown	P53370	3H95	1.7	0.282	2.628								141-316 (316)
7	P0C024	NUDT7	Peroxisomal coenzyme A diphosphatase NUDT7	238	CoA, CoA esters, oxidized CoA	P0C024	5T3P	2.03	0.309	2.78	0.82		0.4	229.1				14-232 (238)
9	Q9BW91	NUDT9, NUDT10, PSEC0099, UNQ3012/PRO9771	ADP-ribose pyrophosphatase, mitochondrial	350	ADP-ribose	Q9BW91	1Q33	1.81	0.288	2.684								59-350 (350)
10	Q8NFP7	NUDT10, APS2, DIPP3A	Diphosphoinositol polyphosphate phosphohydrolase 3-alpha	164	PP-InsP5, Ap6A, Ap5A, 5-phosphoribose 1-diphosphate	Q8NFP7	3MCF	2	0.299	2.718								17-144 (164)
12	Q9BQG2	NUDT12	Peroxisomal NADH pyrophosphatase NUDT12	462	NAD(P)H, diadenosine diphosphate	Q9BQG2	6SCX	2.92			1.046	0.996						115-459 (462)			functional dimer
14	O95848	NUDT14, UGPP	Uridine diphosphate glucose pyrophosphatase	222	UDP-glucose, ADP-ribose	O95848	3Q91	2.7	0.354	2.932								39-220 (222)
15	Q9NV35	NUDT15, MTH2	Probable 8-oxo-dGTP diphosphatase NUDT15	164	GTP, dGTP, 6-thio-GTP, 6thio-dGTP	Q9NV35	5BON	1.8	0.231	2.405	0.98	0.9	0.61	317.6	0.2	188.3		9-164 (164)
16	Q96DE0	NUDT16	U8 snoRNA-decapping enzyme	195	IDP > dIDP >> GDP = dGDP > XDP = ITP = dITP	Q96DE0	3COU	1.8	0.222	2.357								3-182 (195)
17	P0C025	NUDT17	Nucleoside diphosphate-linked moiety X motif 17	328	Unknown	P0C025	5LF8	2.56	0.263	2.565								4-293 (328)
18	Q6ZVK8	NUDT18, MTH3	8-oxo-dGDP phosphatase NUDT18	323	8-oxo-dGDP, 8-oxo-GDP	Q6ZVK8	3GG6	2.1	0.251	2.5								36-179 (322)
20	Q8IU60	NUDT20, DCP2	m7GpppN-mRNA hydrolase	420	mRNA 7-methyl guanine cap	Q8IU60	5MP0	1.63	0.312	2.794								96-244 (420)
21	O43809	NUDT21 CFIM25,CPSF25,CPSF5	Cleavage and polyadenylation specificity factor subunit 5	227	pre-mRNA	O43809	3BAP	1.85	0.308	2.752								21-227 (227)
22	Q9BRQ3	NUDT22 PP11246	Nucleoside diphosphate-linked moiety X motif 22	303	Unknown	Q9BRQ3	5LF9	1.45	0.367	2.938								1-290 (303)
23	P18031	PTP1B	Tyrosine-protein phosphatase non-receptor type 1	435			2HNP	2.85	ND	ND								5-282 (435)

## Sheet: DogSite
protein	pdb	volumen	DrugScore	# pocket
NUDT1	3Q93	600	0.81	1
NUDT1	3Q93	322	0.59	2
NUDT1	3Q93	247	0.45	3
NUDT1	3Q93	124	0.3	4
NUDT10	3MCF	619	0.82	1
NUDT10	3MCF	282	0.59	2
NUDT10	3MCF	148	0.25	3
NUDT10	3MCF	120	0.22	6
NUDT10	3MCF	134	0.21	5
NUDT10	3MCF	136	0.2	4
NUDT14	3Q91	1123	0.81	1
NUDT14	3Q91	195	0.62	2
NUDT14	3Q91	128	0.34	4
NUDT14	3Q91	180	0.3	3
NUDT14	3Q91	125	0.22	5
NUDT14	3Q91	102	0.2	6
NUDT15	5BON	566	0.75	1
NUDT15	5BON	474	0.72	3
NUDT15	5BON	398	0.63	4
NUDT15	5BON	233	0.59	2
NUDT15	5BON	229	0.41	5
NUDT15	5BON	221	0.37	6
NUDT15	5BON	202	0.39	7
NUDT15	5BON	165	0.4	8
NUDT15	5BON	148	0.31	9
NUDT15	5BON	115	0.19	10
NUDT16	3COU	781	0.8	1
NUDT16	3COU	344	0.66	2
NUDT16	3COU	288	0.56	3
NUDT16	3COU	247	0.41	4
NUDT16	3COU	114	0.37	5
NUDT17	5LF8	1194	0.81	1
NUDT17	5LF8	492	0.79	2
NUDT17	5LF8	196	0.49	5
NUDT17	5LF8	174	0.45	7
NUDT17	5LF8	238	0.42	3
NUDT17	5LF8	182	0.38	6
NUDT17	5LF8	204	0.32	4
NUDT17	5LF8	158	0.32	8
NUDT17	5LF8	157	0.32	9
NUDT18	3GG6	395	0.63	1
NUDT18	3GG6	391	0.61	2
NUDT18	3GG6	145	0.45	3
NUDT18	3GG6	127	0.3	4
NUDT2	3U53	810	0.81	1
NUDT2	3U53	232	0.45	2
NUDT20	5MP0	754	0.88	1
NUDT20	5MP0	204	0.55	2
NUDT20	5MP0	150	0.43	4
NUDT20	5MP0	137	0.36	5
NUDT20	5MP0	179	0.34	3
NUDT21	3BAP	1509	0.81	1
NUDT21	3BAP	188	0.44	2
NUDT21	3BAP	145	0.38	4
NUDT21	3BAP	169	0.36	3
NUDT21	3BAP	132	0.29	5
NUDT22	5LF9	868	0.82	1
NUDT22	5LF9	403	0.81	3
NUDT22	5LF9	578	0.73	2
NUDT22	5LF9	186	0.47	4
NUDT22	5LF9	140	0.35	6
NUDT22	5LF9	161	0.34	5
NUDT22	5LF9	130	0.34	7
NUDT22	5LF9	124	0.31	8
NUDT22	5LF9	111	0.2	9
NUDT3	2FVV	669	0.82	1
NUDT3	2FVV	200	0.33	2
NUDT3	2FVV	169	0.28	3
NUDT4	5LTU	435	0.72	1
NUDT4	5LTU	370	0.66	2
NUDT4	5LTU	149	0.26	3
NUDT4	5LTU	100	0.24	6
NUDT4	5LTU	109	0.21	5
NUDT4	5LTU	148	0.2	4
NUDT5	6GRU	1112	0.81	1
NUDT5	6GRU	504	0.76	2
NUDT5	6GRU	288	0.59	3
NUDT5	6GRU	239	0.51	4
NUDT5	6GRU	207	0.5	5
NUDT5	6GRU	179	0.35	6
NUDT5	6GRU	132	0.24	9
NUDT5	6GRU	130	0.21	7
NUDT6	3H95	643	0.82	1
NUDT6	3H95	430	0.78	2
NUDT6	3H95	179	0.27	3
NUDT6	3H95	102	0.25	5
NUDT6	3H95	102	0.23	4
NUDT6	3H95	101	0.19	6
NUDT7	5T3P	902	0.84	1
NUDT7	5T3P	702	0.77	2
NUDT7	5T3P	185	0.54	7
NUDT7	5T3P	274	0.48	3
NUDT7	5T3P	207	0.42	4
NUDT7	5T3P	194	0.32	5
NUDT7	5T3P	191	0.29	6
NUDT7	5T3P	105	0.24	8
NUDT7	5T3P	105	0.21	9
NUDT9	1Q33	634	0.82	2
NUDT9	1Q33	760	0.8	1
NUDT9	1Q33	458	0.64	3
NUDT9	1Q33	188	0.32	4
NUDT9	1Q33	156	0.31	6
NUDT9	1Q33	177	0.28	5
NUDT9	1Q33	147	0.28	8
NUDT9	1Q33	150	0.27	7
NUDT9	1Q33	142	0.21	9
PTPB1B	2HNP	501	0.72	1
PTPB1B	2HNP	278	0.53	2
PTPB1B	2HNP	232	0.53	3
PTPB1B	2HNP	208	0.43	4
PTPB1B	2HNP	155	0.35	8
PTPB1B	2HNP	129	0.33	9
PTPB1B	2HNP	174	0.3	6
PTPB1B	2HNP	200	0.29	5
PTPB1B	2HNP	158	0.26	7
NUDT12	6SCX	760	0.87	1
NUDT12	6SCX	639	0.79	2
NUDT12	6SCX	559	0.85	3
NUDT12	6SCX	546	0.79	4
NUDT12	6SCX	478	0.78	5
NUDT12	6SCX	418	0.65	6
NUDT12	6SCX	398	0.7	7
NUDT12	6SCX	311	0.52	8
NUDT12	6SCX	275	0.58	9
NUDT12	6SCX	228	0.35	10
NUDT12	6SCX	227	0.42	11
NUDT12	6SCX	219	0.46	12
NUDT12	6SCX	173	0.38	13
NUDT12	6SCX	173	0.41	14
NUDT12	6SCX	170	0.45	15
NUDT12	6SCX	165	0.38	16
NUDT12	6SCX	135	0.25	17
NUDT12	6SCX	132	0.24	18
NUDT12	6SCX	122	0.21	19
NUDT12	6SCX	121	0.21	20
NUDT12	6SCX	110	0.2	21
NUDT12	6SCX	108	0.25	22

## Sheet: FTMap
Protein	PDB	# cluster	> 16 probes in cluster close to highest ranking site (DogSite)	> 16 probes in cluster close to second highest ranking site (DogSite) [value DrugScore]	> 16 probes in cluster close to highest ranking site (SiteMap)						DogSite = SiteMap
NUDT1	3Q93	9	y		y						y
NUDT2	3U53	14	y		y						y
NUDT3	2FVV	10	y		y						y
NUDT4	5LTU	10	n		n						n
NUDT5	6GRU	10	y	y [0.76]	y						y
NUDT6	3H95	14	y	y [0.78]	y						y	secondary sites are identical, but SiteMap returns low scores
NUDT7	5T3P	11	y	n [0.77]	y						y
NUDT9	1Q33	12	y	n [0.82]	y						y
NUDT10	3MCF	9	y		y						y
NUDT12	6SCX	4	y	n [0.85]	y						y
NUDT14	3Q91	10	y		y						y
NUDT15	5BON	11	y	n [0.72]	y						y	second active site of dimer not secomd highest ranking site; is third 0.63
NUDT16	3COU	10	y		y						y
NUDT17	5LF8	7	y	n [0.79]	y						y
NUDT18	3GG6	13	n		n						y
NUDT20	5MP0	13	y		y						y
NUDT21	3BAP	6	y		y						y
NUDT22	5LF9	9	y	y [0.81]	y						y
PTP1B	2HNP	8	y (exclusively in 0.38 part of the pocket)		y						y

## Sheet: CryptoSite
Protein	Pdb	# sites	highest			comment
NUDT1	3Q93	42	0.486			high ranking sites around active site
NUDT2	3U53	17	0.486			all around highest ranking DogSite
NUDT3	2FVV	20	0.336			most around ligand, some are remote opposite
NUDT4	5LTU	25	0.311			most around hihest ranking site, some are remote
NUDT5	6GRU	34	0.429			most around highest ranking sites
NUDT6	3H95	26	0.296			around pocket one and two
NUDT7	5T3P	73	0.453			around pocket one and two
NUDT9	1Q33	31	0.331			all around highest ranking DogSite
NUDT10	3MCF	11	0.263			quite distributed, some in highest ranking DogSite, some isolated, no network
NUDT12	6SCX	48	0.48			all around highest ranking DogSite
NUDT14	3Q91	42	0.473			all around highest ranking DogSite
NUDT15	5BON	53	0.365			around both dimer sites
NUDT16	3COU	43	0.447			all around highest ranking DogSite
NUDT17	5LF8	86	0.5			very extensive network past highest ranking DogSite
NUDT18	3GG6	24	0.31			all around highest ranking DogSite
NUDT20	5MP0	22	0.44			all around highest ranking DogSite
NUDT21	3BAP	73	0.37			close to highest ranking DogSite
NUDT22	5LF9	52	0.52			close to pcoket one and two
PTP1B	2HNP	33	0.334			all around highest ranking DogSite
		40.1111	0.405333

## Sheet: Percentage identity
Percentage identity matrix created by Clustal Omega
	PTP1B	NUDT22	NUDT19	NUDT16	NUDT7	NUDT8	NUDT9	NUDT21	NUDT6	NUDT2	NUDT20	NUDT3	NUDT4	NUDT10	NUDT11	NUDT12	NUDT13	NUDT14	NUDT17	NUDT5	NUDT1	NUDT15	NUDT18
PTP1B	100
NUDT22	15.09	100
NUDT19	17.08	18.13	100
NUDT16	8.19	12.21	19.34	100
NUDT7	15.94	13.17	15.94	18.86	100
NUDT8	10.63	17.53	20.38	21.14	28.18	100
NUDT9	11.34	9.95	12.18	9.45	12.42	16.44	100
NUDT21	8.05	6.16	10.69	10.58	11.11	12.1	15.05	100
NUDT6	7.14	8.96	13.6	12.5	18	17.14	17.37	14.61	100
NUDT2	10.75	7.69	10.64	13.33	20	15.62	15.91	17.97	18.46	100
NUDT20	11.33	10	11.57	12.87	10.4	14.62	13.42	12.92	20	17.61	100
NUDT3	12.28	12.61	9.02	13.83	15.18	15.97	16.43	8.78	18	21.54	19.88	100
NUDT4	10.08	14.41	10.16	12.77	14.29	18.49	15.71	8.55	20.25	21.54	19.55	74.42	100
NUDT10	10.81	14.41	9.32	13.83	14.29	17.65	14.29	8.33	20.98	21.37	20.25	73.62	89.57	100
NUDT11	10.81	14.41	9.32	13.83	14.29	17.65	14.29	8.33	20.28	21.37	20.25	74.23	90.18	99.39	100
NUDT12	13.73	10.98	9.77	13.76	12.5	15.32	14.68	13.91	17.33	17.39	16.15	21.37	18.8	18.1	18.1	100
NUDT13	13.04	11.36	11.72	12.04	11.54	20.47	14.17	14.09	16.43	18.26	14.58	16.67	16.67	16.67	16.67	33.33	100
NUDT14	9.86	9.15	14.39	14.75	14.52	13.33	14.62	10.74	14.04	16.38	17.09	17.12	17.12	19.09	19.09	17.52	17.56	100
NUDT17	11.56	14.12	14.53	15.45	15.67	16.43	14.35	12.83	15.7	21.09	13.56	16.78	16	17.91	17.91	16.15	18.46	16.46	100
NUDT5	9.88	12.07	12.58	11.03	19.33	10.74	12.65	14.07	17.76	14.78	17.05	18.26	19.13	19.3	19.3	18.06	14.1	23.08	14.14	100
NUDT1	8.9	9.7	14.38	18.18	14.69	17.27	16.45	14.53	16.04	18.42	14.17	18.75	16.96	18.75	18.75	20.53	18.95	20.71	17.71	15.05	100
NUDT15	10.92	13.01	13.22	12.87	12.82	15.65	14.18	17.17	17.48	21	15	14.29	16.07	16.96	16.96	17.46	16.28	18.9	25.76	21.74	22.06	100
NUDT18	10.76	12.24	16.34	15.18	11.36	17.73	13.69	13.7	22.63	16.67	18.83	19.01	20.28	20.44	20.44	21.02	22.7	17.73	22.67	13.41	17.24	23.42	100

## Sheet: Fragment screen conditions
	NUDT1	NUDT2	NUDT5	NUDT15
Protein conc. (µM)	3	4	5	4
Buffer pH	8	8	8	7.5
Tween20 (%)	0.005	0.005	0.005	-
TCEP (mM)	-	-	-	1
Sypro Orange final conc.	5x	5x	5x	5x
DMSO (%)	1	1	1	1
Positive control conc. (µM)	100	100	100	100
Fragment conc. (µM)	500	500	500	500
Temperature range (°C)	25-80	25-95	35-90	25-95
Native Tm (°C)	50	50	76	57
# fragments screened	450	650	450	1200
# primary hits	44	35	0	60
Primary hit rate (%)	9.8	5.4	0	5

## Sheet: ZINC Fragment Docking
	Gene Name	ZFN Mean Docking Score (kcal/mol)	ZFN Median Docking Score (kcal/mol)
	NUDT1	-11.617	-11.441
	NUDT5, HSPC115	-10	-9.86
	NUDT17	-8.855	-8.781
	NUDT6, FGF2AS	-7.843	-7.665
	NUDT15, MTH2	-7.608	-7.493
	NUDT9, NUDT10, PSEC0099, UNQ3012/PRO9771	-7.502	-7.372
	NUDT7	-7.481	-7.371
	PTP1B	-6.926	-6.818
	NUDT3, DIPP, DIPP1	-7.495	-6.696
	NUDT16	-6.761	-6.647
	NUDT2, APAH1	-6.669	-6.45
	NUDT22 PP11246	-6.39	-6.255
	NUDT14, UGPP	-5.971	-5.842
	NUDT21 CFIM25,CPSF25,CPSF5	-5.91	-5.784
	NUDT18, MTH3	-5.818	-5.011
	NUDT20, DCP2	-4.809	-4.699
	NUDT10, APS2, DIPP3A	-4.474	-4.289
	NUDT4, DIPP2, KIAA0487, HDCMB47P	-4.402	-3.98
	NUDT12

## Sheet: Fragment screening hit rates
Target	Hit rate
NUDT1	9.8
NUDT15	5
NUDT2	5.3
NUDT21	5.6
NUDT22	1.6
NUDT4	0.9
NUDT5	14.7
NUDT7	5.1

## Sheet: Screens using malachite green
Target	Tested cmpds	Hit limit	# hits	Hit rate	Tested PAINS	Hit limit PAINS	# PAINS hits	Hit rate PAINS	Tested aggregators	Hit limit aggregators	# aggregator hits	Hit rate aggregators
NUDT1	5336	66.3595	217	4.06672	159	64.2014	4	2.51572	13	30.1496	0	0
NUDT2	5336	47.4881	61	1.14318	159	87.8789	3	1.88679	13	63.1603	0	0
NUDT5	5336	9.00184	20	0.374813	159	8.46516	0	0	13	9.23223	0	0
NUDT15	5336	14.0311	18	0.337331	159	36.737	5	3.14465	13	10.6339	0	0
NUDT16	5336	13.5891	36	0.674663	159	30.6788	3	1.88679	13	10.1322	0	0
dUTPase	5336	25.4591	7	0.131184	159	26.7738	0	0	13	31.04	0	0
ITPase	5281	19.742	6	0.113615	159	19.9657	0	0	13	22.4505	0	0
dCTPase	5336	36.6441	102	1.91154	159	54.8433	6	3.77358	13	36.3944	0	0
In the above table the hit rate was determined based on the avearge plus three standard deviations of the response for library compounds
NUDT1	5336	66.3595	217	4.06672	159	64.2014	4	2.51572	13	30.1496	0	0
NUDT2	5336	47.4881	61	1.14318	159	87.8789	3	1.88679	13	63.1603	0	0
NUDT5	5336	30	3	0.0562219	159	8.46516	0	0	13	9.23223	0	0
NUDT15	5336	30	10	0.187406	159	36.737	5	3.14465	13	10.6339	0	0
NUDT16	5336	30	7	0.131184	159	30.6788	3	1.88679	13	10.1322	0	0
dUTPase	5336	30	1	0.0187406	159	26.7738	0	0	13	31.04	0	0
ITPase	5281	30	2	0.0378716	159	19.9657	0	0	13	22.4505	0	0
dCTPase	5336	36.6441	102	1.91154	159	54.8433	6	3.77358	13	36.3944	0	0
In the above table different responses are normlaised by increasing the "general" hit limit to 30%, while keeping those for NUDT1, NUDT2 and dCTPase; for better comparison.
NUDT1	5336	30	429	8.03973	159	64.2014	4	2.51572	13	30.1496	0	0
NUDT2	5336	30	261	4.8913	159	87.8789	3	1.88679	13	63.1603	0	0
NUDT5	5336	30	3	0.0562219	159	8.46516	0	0	13	9.23223	0	0
NUDT15	5336	30	10	0.187406	159	36.737	5	3.14465	13	10.6339	0	0
NUDT16	5336	30	7	0.131184	159	30.6788	3	1.88679	13	10.1322	0	0
dUTPase	5336	30	1	0.0187406	159	26.7738	0	0	13	31.04	0	0
ITPase	5281	30	2	0.0378716	159	19.9657	0	0	13	22.4505	0	0
dCTPase	5336	30	152	2.84858	159	54.8433	6	3.77358	13	36.3944	0	0
Hitlimit 30% for all screens

[truncated: 1 more sheets: Fragment promiscuity]
